# Supplementary material
Source: publisher site journal article supplement (https://www.dovepress.com/article/422500)
Supplement: Supplementary file 1 [file get_supplementary_file.php]

**Supplementary- Table 1.** Baseline clinicopathologic characteristics of patients with adjuvant therapies

| Clinicopathological  Characteristics | Patient Distribution (n =238) | | |
| --- | --- | --- | --- |
| Total  n =238 (%) | Relapse  n=90 (%) | No relapse  n=148 (%) |
| Age |  |  |  |
| <=70 | 212 (89.1) | 78 (36.8) | 134 (63.2) |
| >70 | 26 (10.9) | 12 (46.2) | 14 (53.8) |
| Gender |  |  |  |
| Female | 89 (37.4) | 25 (28.1) | 64 (71.9) |
| Male | 149 (62.6) | 65 (43.6) | 84 (56.4) |
| T stage |  |  |  |
| 1 | 1 (0.4) | 0 (0.0) | 1 (100) |
| 2 | 28 (11.8) | 8 (28.6) | 20 (71.4) |
| 3 | 45 (18.9) | 20 (44.4) | 25 (55.6) |
| 4 | 164 (68.9) | 62 (37.8) | 102 (62.2) |
| N stage |  |  |  |
| 0 | 111 (46.6) | 24 (21.6) | 87 (78.4) |
| 1 | 79 (33.2) | 34 (43.0) | 45 (57.0) |
| 2 | 48 (20.2) | 32 (66.7) | 16 (33.3) |
| Grade |  |  |  |
| High | 11 (4.6) | 6 (54.5) | 5 (45.5) |
| Mod | 158 (66.4) | 57 (36.1) | 101 (63.9) |
| Low | 69 (29.0) | 27 (39.1) | 42 (60.9) |
| Site |  |  |  |
| Right-sided colon | 59 (24.8) | 22 (37.3) | 37 (62.7) |
| Left-sided colon | 70 (29.4) | 25 (35.7) | 45 (64.3) |
| Rectum | 109 (45.8) | 43 (39.4) | 66 (60.6) |
| pre-LMR |  |  |  |
| High | 100 (42.0) | 31 (31.0) | 69 (69.0) |
| Low | 138 (58.0) | 59 (42.8) | 79 (57.2) |
| pos-LMR |  |  |  |
| High | 102 (42.9) | 31 (30.4) | 71 (69.6) |
| Low | 136 (57.1) | 59 (43.4) | 77 (56.6) |
| f-LMR |  |  |  |
| High | 92 (38.7) | 31 (33.7) | 61 (66.3) |
| Low | 75 (31.5) | 55 (73.3) | 20 (26.7) |
| absent | 71 (29.8) | 4 (5.6) | 67 (94.4) |
| p-LMR-p change group |  |  |  |
| High to High | 60 (25.2) | 16 (26.7) | 44 (73.3) |
| Low to High | 42 (17.6) | 15 (35.7) | 27 (64.3) |
| High to Low | 40 (16.8) | 15 (37.5) | 25 (62.5) |
| Low to Low | 96 (40.3) | 44 (45.8) | 52 (54.2) |
| p-LMR-f change group |  |  |  |
| High to High | 61 (25.6) | 20 (32.8) | 41 (67.2) |
| Low to High | 31 (13.0) | 11 (35.5) | 20 (64.5) |
| High to Low | 15 (6.3) | 11 (73.3) | 4 (26.7) |
| Low to Low | 60 (25.2) | 44 (73.3) | 16 (26.7) |
| absent | 71 (29.8) | 4 (5.6) | 67 (94.4) |
| pre-NLR |  |  |  |
| Low | 190 (79.8) | 26 (54.2) | 22 (45.8) |
| High | 48 (20.2) | 64 (33.7) | 126 (66.3) |
| pos-NLR |  |  |  |
| High | 50 (21.0) | 22 (44.0) | 28 (56.0) |
| Low | 188 (79.0) | 68 (36.2) | 120 (63.8) |
| f-NLR |  |  |  |
| Low | 111 (46.7) | 48 (43.2) | 63 (56.8) |
| High | 56 (23.5) | 38 (67.9) | 18 (32.1) |
| absent | 71 (29.8) | - | - |
| p-NLR-p change group |  |  |  |
| High to High | 155 (65.1) | 52 (33.5) | 103 (66.5) |
| Low to High | 35 (14.7) | 12 (34.3) | 23 (65.7) |
| High to Low | 38 (16.0) | 19 (50.0) | 19 (50.0) |
| Low to Low | 10 (4.2) | 7 (70.0) | 3 (30.0) |
| p-NLR-f change group |  |  |  |
| High to High | 55 (23.1) | 25 (45.5) | 30 (54.5) |
| Low to High | 31 (13.0) | 19 (61.3) | 12 (38.7) |
| High to Low | 29 (12.2) | 10 (34.5) | 19 (65.5) |
| Low to Low | 52 (21.9) | 32 (61.5) | 20 (38.5) |
| absent | 71 (29.8) |  |  |

**Notes:** pre-LMR, preoperative lymphocyte-to-monocytes ratio; pos-LMR, post-treatment lymphocytes-to-monocytes ratio; f-LMR, Lymphocyte-to-monocytes ratio pre-end of follow-up; p-LMR-p change group, the dynamic changes of lymphocyte-to-monocytes ratio from preoperative to post-treatment; p-LMR-f change group, the dynamic changes of lymphocyte-to-monocytes ratio from post-treatment to pre-end of follow up; pre-NLR, preoperative neutrophil-lymphocyte ratio; pos-NLR, post-treatment neutrophil-lymphocyte ratio; f-NLR, neutrophil-lymphocyte ratio of pre-end of follow-up; p-NLR-p change group, the dynamic changes of neutrophil-lymphocyte ratio from preoperative to post-treatment; p-NLR-f change group, the dynamic changes of neutrophil-lymphocyte ratio from post-treatment to pre-end of follow-up.

**Abbreviations:** LMR, lymphocyte-to-monocytes ratio; Mod, moderate; NLR, neutrophil-lymphocyte ratio; n, number.

**Supplementary-Table 2.** Baseline clinicopathologic characteristics of patients with surgery

| Clinicopathological Characteristics | Patient Distribution (n =357) | | |
| --- | --- | --- | --- |
| Total  n =119 (%) | Relapse  n=24 (%) | No relapse  n=95 (%) |
| Age |  |  |  |
| <=70 | 78 (65.5) | 13 (16.7) | 65 (83.3) |
| >70 | 41 (34.5) | 11 (26.8) | 30 (73.2) |
| Gender |  |  |  |
| Female | 60 (50.4) | 13 (21.7) | 47 (78.3) |
| Male | 59 (49.6) | 11 (18.6) | 48 (81.4) |
| T stage |  |  |  |
| 1 | 8 (6.7) | 1 (12.5) | 7 (87.5) |
| 2 | 41 (34.5) | 9 (22.0) | 32 (78.0) |
| 3 | 13 (10.9) | 4 (30.8) | 9 (69.2) |
| 4 | 57 (47.9) | 10 (17.5) | 47 (82.5) |
| N stage |  |  |  |
| 0 | 102 (85.7) | 15 (14.7) | 87 (85.3) |
| 1 | 12 (10.1) | 7 (58.3) | 5 (41.7) |
| 2 | 5 (4.2) | 2 (40.0) | 3 (60.0) |
| Grade |  |  |  |
| High | 27 (22.7) | 5 (18.5) | 22 (81.5) |
| Mod | 26 (21.8) | 4 (15.4) | 22 (84.6) |
| Low | 66 (55.5) | 15 (22.7) | 51 (77.3) |
| Site |  |  |  |
| Right-sided colon | 10 (8.5) | 0 (0) | 10 (100.0) |
| Left-sided colon | 80 (67.8) | 17 (21.3) | 63 (78.8) |
| Rectum | 28 (23.7) | 7 (25.0) | 21 (75.0) |
| pre-LMR |  |  |  |
| High | 50 (42.0) | 6 (12.0) | 44 (88.0) |
| Low | 69 (58.0) | 18 (26.1) | 51 (73.9) |
| pos-LMR |  |  |  |
| High | 61 (51.3) | 7 (11.5) | 54 (88.5) |
| Low | 58 (48.7) | 17 (29.3) | 41 (70.7) |
| f-LMR |  |  |  |
| High | 13 (10.9) | 2 (15.4) | 11 (84.6) |
| Low | 29 (24.4) | 16 (55.2) | 13 (44.8) |
| Absent | 77 (64.9) | 6 (7.8) | 71 (92.2) |
| p-LMR-p change group |  |  |  |
| High- High | 16 (13.4) | 0 (0.0) | 16 (100.0) |
| Low- High | 10 (8.4) | 1 (10.0) | 9 (90.0) |
| High- Low | 41 (34.5) | 8 (19.5) | 33 (80.5) |
| Low - Low | 52 (43.7) | 15 (28.8) | 37 (71.2) |
| p-LMR-f change group |  |  |  |
| High- High | 20 (16.8) | 6 (30.0) | 14 (70.0) |
| Low - High | 11 (9.2) | 5 (45.5) | 6 (54.5) |
| High - Low | 2 (1.7) | 1 (50.0) | 1 (50.0) |
| Low -Low | 9 (7.6) | 6 (66.7) | 3 (33.3) |
| absent | 77 (64.7) | 6 (7.8) | 71 (92.2) |

**Notes:** pre-LMR, preoperative lymphocyte-to-monocytes ratio; pos-LMR, lymphocytes-to-monocytes ratio post-treatment; f-LMR, lymphocyte-to-monocytes ratio pre-end of follow-up; p-LMR-p change group, the dynamic changes of lymphocyte-to-monocytes ratio from preoperative to post-treatment; p-LMR-f change group, the dynamic changes of lymphocyte-to-monocytes ratio from post-treatment to pre-end of follow up.

**Abbreviations:** LMR, lymphocyte-to-monocytes ratio; Mod, moderate; n, number.

**Supplementary-Table 3.** Here are the optimal cut-off values for different time points of LMR, NLR, and CEA

| **Total cohort** | **Cut-off** | **Adjuvant Therapy Group** | **Cut-off** | **Surgery subgroup** | **Cut-off** |
| --- | --- | --- | --- | --- | --- |
| pre-LMR | 3.775 | pre-LMR | 3.87 | pre-LMR | 4.08 |
| pos-LMR | 3.81 | pos-LMR | 3.81 | pos-LMR | 2.7 |
| f-LMR | 3.7 | f-LMR | 3.7 | f-LMR | 4.98 |
| p-LMR-p change group | 3.81 | p-LMR-p change group | 3.81 | p-LMR-p change group | 3.91 |
| p-LMR-f change group | 3.69 | p-LMR-f change group | 3.69 | p-LMR-f change group | 2.65 |
| pre-NLR | 3.23 | pre-NLR | 3.19 | pre-NLR | 1.47 |
| pos-NLR | 5.13 | pos-NLR | 3.02 | pos-NLR | 2.56 |
| f-NLR | 2.78 | f-NLR | 2.78 | f-NLR | 2.40 |
| p-NLR-p change group | 1.45 | p-NLR-p change group | 3.17 | p-NLR-p change group | 1.91 |
| p-NLR-f change group | 2.16 | p-NLR-f change group | 2.16 | p-NLR-f change group | 2.56 |
| CEA | 4.1 | CEA | 4.1 | CEA | 3.95 |

**Notes:** pre-LMR, preoperative lymphocyte-to-monocytes ratio; pos-LMR, Lymphocytes-to-monocytes ratio post-treatment; f-LMR, Lymphocyte-to-monocytes ratio pre-end of follow-up; p-LMR-p change group, the dynamic changes of lymphocyte-to-monocytes ratio from preoperative to post-treatment; p-LMR-f change group, the dynamic changes of lymphocyte-to-monocytes ratio from post-treatment to pre-end of follow up.

**Abbreviations:** LMR, lymphocyte-to-monocytes ratio; NLR, neutrophil-lymphocyte ratio.

**Supplementary-Table 4.** The value of the LMR

| **Number** | **pre-LMR** | **pos-LMR** | **f-LMR** | **number** | **pre-LMR** | **pos-LMR** | **f-LMR** | **number** | **pre-LMR** | **pos-LMR** | **f-LMR** |
| --- | --- | --- | --- | --- | --- | --- | --- | --- | --- | --- | --- |
| 1 | 9.5 | 3 |  | 123 | 1.33 | 1.4 | 2.33 | 245 | 3.67 | 5 | 5.5 |
| 2 | 3.83 | 5.5 |  | 124 | 4.83 | 9.2 |  | 246 | 3.75 | 6 | 6.33 |
| 3 | 3.75 | 3.67 | 3.67 | 125 | 3.6 | 7 | 4.83 | 247 | 4 | 4.33 | 3.25 |
| 4 | 2.86 | 2.8 |  | 126 | 3.67 | 6 | 2.2 | 248 | 5.67 | 8 | 6.33 |
| 5 | 2.25 | 2.5 | 2 | 127 | 5 | 6.21 | 3 | 249 | 5 | 10 | 5 |
| 6 | 4.5 | 4 | 5.25 | 128 | 2.33 | 3 |  | 250 | 3 | 4.67 |  |
| 7 | 3.25 | 2 |  | 129 | 3 | 1.7 | 2.5 | 251 | 2.4 | 2.11 | 1.55 |
| 8 | 4.333 | 14 |  | 130 | 2.6 | 3.67 |  | 252 | 2.44 | 5.75 | 8 |
| 9 | 4.25 | 2.29 |  | 131 | 5.6 | 3 | 3.75 | 253 | 4.83 | 5.83 | 6 |
| 10 | 2.67 | 2.75 |  | 132 | 3 | 4.33 |  | 254 | 4.25 | 2.5 |  |
| 11 | 3.67 | 6.67 | 5.46 | 133 | 3.5 | 2 | 2.5 | 255 | 2 | 4.33 | 7 |
| 12 | 3.25 | 2.75 |  | 134 | 7.67 | 2.17 | 4.25 | 256 | 4.75 | 2.67 | 4.25 |
| 13 | 2.33 | 3.5 | 3.2 | 135 | 2 | 3.75 |  | 257 | 12 | 7.25 | 6.25 |
| 14 | 4.5 | 2.75 |  | 136 | 7.5 | 7.33 | 5 | 258 | 3 | 2.6 |  |
| 15 | 6.67 | 7.5 | 4.25 | 137 | 5 | 2.33 |  | 259 | 1.86 | 1.33 | 1.83 |
| 16 | 4.33 | 6 | 4.67 | 138 | 2 | 3 | 2.2 | 260 | 6.67 | 4.33 | 5 |
| 17 | 6.25 | 2.67 | 4.2 | 139 | 6.4 | 4.25 | 6.75 | 261 | 4.5 | 5.75 | 5.5 |
| 18 | 4.4 | 4 | 4.17 | 140 | 4.67 | 1.29 |  | 262 | 3.67 | 1.43 |  |
| 19 | 5.75 | 2.64 | 2.25 | 141 | 4.18 | 2.5 |  | 263 | 3.5 | 2.6 |  |
| 20 | 13.5 | 4.75 | 4.4 | 142 | 2.29 | 3 |  | 264 | 3.2 | 1.6 | 2.8 |
| 21 | 2 | 2 |  | 143 | 2.5 | 3 |  | 265 | 2.6 | 3 |  |
| 22 | 4 | 5.5 | 3.67 | 144 | 5.33 | 2 | 2.81 | 266 | 4.67 | 4 | 3.4 |
| 23 | 2.33 | 5.67 | 5 | 145 | 3.6 | 3.5 | 5.91 | 267 | 9 | 4 | 7 |
| 24 | 5.75 | 5.67 |  | 146 | 1.8 | 1.38 | 4.97 | 268 | 3.17 | 3.6 | 4.75 |
| 25 | 5.75 | 4 |  | 147 | 2 | 6 |  | 269 | 3 | 3.5 |  |
| 26 | 3.4 | 5 | 6 | 148 | 2.5 | 3.2 | 6.25 | 270 | 2.75 | 3 | 3.33 |
| 27 | 3.4 | 2 | 4 | 149 | 4 | 5 |  | 271 | 1.43 | 3 | 2.71 |
| 28 | 3 | 0.57 | 0.67 | 150 | 3 | 0.59 |  | 272 | 3.33 | 6 | 5.5 |
| 29 | 3.67 | 4.5 | 4.5 | 151 | 3 | 1.6 |  | 273 | 3.4 | 3 | 1.8 |
| 30 | 3.13 | 4.25 | 1.85 | 152 | 4 | 2.83 |  | 274 | 4.25 | 2.17 |  |
| 31 | 3.4 | 2.8 | 3.8 | 153 | 4.83 | 3.2 |  | 275 | 4.25 | 1.75 |  |
| 32 | 3.5 | 9 |  | 154 | 5 | 2.29 | 2.8 | 276 | 5.33 | 1.75 | 4.25 |
| 33 | 2.6 | 3.64 |  | 155 | 4.5 | 2.14 |  | 277 | 3.14 | 2.57 |  |
| 34 | 2.38 | 3.5 | 2.6 | 156 | 3.4 | 2.8 | 7 | 278 | 3.33 | 4.25 |  |
| 35 | 2.83 | 2.43 |  | 157 | 4.5 | 4 |  | 279 | 2.14 | 3.67 |  |
| 36 | 3 | 1 | 2 | 158 | 4.2 | 3.67 | 7 | 280 | 1.9 | 2 |  |
| 37 | 3.5 | 3 |  | 159 | 5.33 | 8.42 |  | 281 | 2.6 | 1.83 |  |
| 38 | 5.2 | 2.83 | 5 | 160 | 4 | 3.67 | 6 | 282 | 6.33 | 3.2 | 6.04 |
| 39 | 4 | 4.4 |  | 161 | 3.5 | 2.5 |  | 283 | 5 | 5 | 5 |
| 40 | 3.67 | 5.95 |  | 162 | 3.2 | 3.5 | 4.2 | 284 | 1.56 | 9.67 | 7.67 |
| 41 | 3 | 4.75 | 2.75 | 163 | 2.33 | 2.5 | 1.25 | 285 | 3.25 | 3 | 4.33 |
| 42 | 6.33 | 3.5 | 1.35 | 164 | 5 | 2.83 |  | 286 | 2.88 | 3 | 2 |
| 43 | 9 | 3.33 |  | 165 | 2.33 | 2 |  | 287 | 3.67 | 4 | 4.67 |
| 44 | 2.33 | 4.5 |  | 166 | 1.5 | 4 | 2.2 | 288 | 4.4 | 3 | 5 |
| 45 | 6.33 | 5.75 |  | 167 | 1.43 | 1 |  | 289 | 3.17 | 3 | 3 |
| 46 | 2.17 | 2 | 4.3 | 168 | 2.33 | 2.75 | 2.2 | 290 | 3.33 | 4.5 | 6.5 |
| 47 | 1.64 | 2.4 | 1 | 169 | 2.75 | 2.2 | 4 | 291 | 2.57 | 2.86 |  |
| 48 | 2.8 | 2 | 4.5 | 170 | 5.8 | 4.43 |  | 292 | 2.33 | 1 | 0.93 |
| 49 | 3.4 | 3.71 | 3.75 | 171 | 3.5 | 3.14 | 3 | 293 | 1.4 | 3.8 | 3.5 |
| 50 | 3.5 | 2.43 |  | 172 | 2.75 | 1.25 | 3.6 | 294 | 1.5 | 3.33 | 2.67 |
| 51 | 4.2 | 1.6 |  | 173 | 2.8 | 1.83 | 2 | 295 | 3.83 | 2.25 | 4.25 |
| 52 | 6.67 | 5.25 | 4 | 174 | 6.5 | 1.5 | 2.75 | 296 | 7 | 7.67 | 13 |
| 53 | 3.67 | 9.5 | 4.67 | 175 | 2.2 | 7.33 | 7 | 297 | 2.14 | 1.57 | 2.2 |
| 54 | 6.33 | 5.94 |  | 176 | 7.33 | 2.8 |  | 298 | 4.6 | 3.75 |  |
| 55 | 4.6 | 4.67 |  | 177 | 5 | 0.3 |  | 299 | 4.6 | 4.5 |  |
| 56 | 4.75 | 1.5 | 2.6 | 178 | 2.43 | 2 | 2 | 300 | 5 | 3.5 | 5.3 |
| 57 | 2.6 | 3.67 |  | 179 | 7.6 | 3.44 |  | 301 | 4 | 3.2 | 2.6 |
| 58 | 3.75 | 3.25 | 1.88 | 180 | 3.25 | 2 |  | 302 | 5.33 | 4.38 |  |
| 59 | 4.17 | 5.2 | 7.67 | 181 | 4.33 | 5.78 |  | 303 | 3 | 4.33 | 4 |
| 60 | 3.33 | 2.57 | 2.67 | 182 | 7 | 3.67 | 3.67 | 304 | 2.14 | 1.63 |  |
| 61 | 5.67 | 2.33 |  | 183 | 2.6 | 6.33 |  | 305 | 4 | 3.67 |  |
| 62 | 3.75 | 1.18 |  | 184 | 3.14 | 1.86 |  | 306 | 3.75 | 3.25 | 4.2 |
| 63 | 6.5 | 3.33 |  | 185 | 5.75 | 4 |  | 307 | 5 | 2 | 3 |
| 64 | 3 | 4.33 |  | 186 | 4.67 | 3 | 5 | 308 | 1 | 2.4 |  |
| 65 | 3 | 3.5 | 3.75 | 187 | 5.6 | 4 | 4 | 309 | 3.17 | 3.83 | 3.6 |
| 66 | 6.67 | 6 |  | 188 | 5.2 | 2.17 | 3.67 | 310 | 4.4 | 3.75 |  |
| 67 | 8 | 6.30 | 1 | 189 | 3 | 5 |  | 311 | 3.25 | 2 |  |
| 68 | 4.5 | 13.07 |  | 190 | 4.67 | 2 |  | 312 | 3.75 | 5.5 | 7 |
| 69 | 3.75 | 2 | 1.8 | 191 | 3.75 | 3.67 | 2.4 | 313 | 4.2 | 3 |  |
| 70 | 7 | 7.33 | 5.5 | 192 | 8.33 | 6.17 |  | 314 | 2 | 1.83 | 1.86 |
| 71 | 2.5 | 4 |  | 193 | 2.25 | 2.2 |  | 315 | 5.25 | 5 | 6.67 |
| 72 | 4.4 | 4.6 |  | 194 | 3.5 | 2.57 | 1.11 | 316 | 5.25 | 3.5 | 5 |
| 73 | 2.6 | 3 |  | 195 | 4.67 | 3.67 | 0.83 | 317 | 4 | 3 |  |
| 74 | 4.2 | 1.6 |  | 196 | 2.8 | 5 | 5 | 318 | 2.2 | 2 | 2.2 |
| 75 | 3.25 | 1.52 | 1.52 | 197 | 7.25 | 4.4 | 6.5 | 319 | 2 | 2.2 |  |
| 76 | 2.67 | 5.33 | 3.33 | 198 | 4.25 | 12 |  | 320 | 3.75 | 6.33 | 6.75 |
| 77 | 9 | 3 |  | 199 | 2.33 | 1.5 | 1.67 | 321 | 1.4 | 2 |  |
| 78 | 4.8 | 2 | 3.67 | 200 | 4 | 5 |  | 322 | 4 | 2.63 | 4.8 |
| 79 | 1.57 | 2.67 | 2.75 | 201 | 2.75 | 5.25 | 4.25 | 323 | 2 | 2.43 | 3.67 |
| 80 | 5.33 | 2.2 | 1.8 | 202 | 6.67 | 7.33 | 6.67 | 324 | 2.29 | 1.17 |  |
| 81 | 2.75 | 4 | 3.67 | 203 | 7.33 | 4.67 |  | 325 | 3.5 | 1.2 | 4 |
| 82 | 3 | 4.91 |  | 204 | 5.30 | 4.25 |  | 326 | 5.33 | 3.17 |  |
| 83 | 3.2 | 1.75 |  | 205 | 1.63 | 4.67 | 2.67 | 327 | 3.2 | 5.2 | 3.8 |
| 84 | 4.75 | 2.8 | 5 | 206 | 4.5 | 3.75 | 3.67 | 328 | 3.2 | 3 | 4.3 |
| 85 | 3 | 1.75 | 6.5 | 207 | 4.2 | 5.5 | 6.67 | 329 | 4.75 | 7.75 | 9.3 |
| 86 | 1.15 | 0.83 | 3 | 208 | 3.75 | 2 |  | 330 | 9 | 8 | 6.67 |
| 87 | 3.83 | 2 |  | 209 | 3.2 | 4 |  | 331 | 2.8 | 3 |  |
| 88 | 5.33 | 4.75 | 4.5 | 210 | 2 | 4.67 | 4.5 | 332 | 2.83 | 2.71 | 3.4 |
| 89 | 4.25 | 3.25 | 5.67 | 211 | 6 | 4 | 5.5 | 333 | 2.43 | 1 |  |
| 90 | 3.33 | 4 |  | 212 | 4.33 | 3.25 | 4.5 | 334 | 4.8 | 2.25 |  |
| 91 | 5 | 4 | 11 | 213 | 3.33 | 2 | 3.25 | 335 | 7.2 | 1.5 | 4.4 |
| 92 | 3.33 | 2.67 |  | 214 | 2.5 | 2.6 |  | 336 | 7 | 3.44 | 3.75 |
| 93 | 2 | 3.6 | 4.4 | 215 | 0.004 | 4.25 | 4 | 337 | 4.75 | 3.6 |  |
| 94 | 2 | 3.14 |  | 216 | 8.33 | 6.67 | 4.5 | 338 | 1.5 | 3 | 1.5 |
| 95 | 3.33 | 10.5 | 4.33 | 217 | 3.5 | 3.11 | 3.43 | 339 | 3.75 | 3.4 |  |
| 96 | 2.2 | 2.75 | 1.8 | 218 | 3.8 | 3.5 |  | 340 | 2.25 | 3.5 |  |
| 97 | 3.4 | 2.6 | 8 | 219 | 3.33 | 5.33 |  | 341 | 5 | 3.5 | 3 |
| 98 | 5.5 | 6 |  | 220 | 3.75 | 2.33 | 1.8 | 342 | 4 | 1.6 |  |
| 99 | 2.33 | 3.2 |  | 221 | 5 | 8 | 8.5 | 343 | 2.33 | 3.67 | 3.33 |
| 100 | 3.75 | 2.5 | 3.67 | 222 | 3.14 | 3.75 | 2.2 | 344 | 3 | 2.67 | 5. |
| 101 | 4.75 | 2.75 |  | 223 | 2.2 | 1.89 | 3.25 | 345 | 3.5 | 3.5 | 4.5 |
| 102 | 3.75 | 0.67 | 5.25 | 224 | 5 | 3.5 |  | 346 | 3.4 | 3.67 |  |
| 103 | 1.6 | 3 |  | 225 | 2.5 | 2.5 |  | 347 | 3 | 2.33 |  |
| 104 | 4.75 | 1.6 |  | 226 | 1.8 | 1.33 |  | 348 | 1.8 | 1.67 |  |
| 105 | 4.5 | 4.75 |  | 227 | 4 | 2.67 |  | 349 | 4.33 | 3.5 |  |
| 106 | 7.5 | 5.33 | 8 | 228 | 4.5 | 5 | 5 | 350 | 2.5 | 2.25 | 3.5 |
| 107 | 4 | 2 | 2.5 | 229 | 4.17 | 4.33 | 7.5 | 351 | 6.33 | 6.5 | 5.5 |
| 108 | 5.33 | 5 |  | 230 | 2.71 | 3.33 | 4.2 | 352 | 3.43 | 4.29 | 4.5 |
| 109 | 4.8 | 7.41 | 7 | 231 | 6.33 | 2.6 |  | 353 | 4.2 | 1.6 | 4 |
| 110 | 5.5 | 5 | 5.17 | 232 | 4.6 | 2.57 | 6 | 354 | 7 | 2.25 | 5.5 |
| 111 | 2.43 | 1.83 | 3.33 | 233 | 2.83 | 2.25 | 3 | 355 | 1.36 | 1.89 | 2.33 |
| 112 | 3.36 | 0.8 | 0.71 | 234 | 3.4 | 3.2 |  | 356 | 5.33 | 4.5 |  |
| 113 | 3.67 | 2 | 2 | 235 | 4.5 | 3.25 |  | 357 | 3 | 2.4 | 2 |
| 114 | 5.5 | 2.5 | 1.6 | 236 | 2.17 | 1.86 | 1.6 |  |  |  |  |
| 115 | 6.33 | 5 |  | 237 | 3.6 | 4.5 |  |  |  |  |  |
| 116 | 3.25 | 6.33 | 3.14 | 238 | 3.6 | 3.8 | 4.5 |  |  |  |  |
| 117 | 6.4 | 4.6 | 5.67 | 239 | 3.4 | 2.17 | 2.75 |  |  |  |  |
| 118 | 6 | 3 | 3.06 | 240 | 1.7 | 5.2 | 4.5 |  |  |  |  |
| 119 | 4.67 | 7.39 |  | 241 | 3 | 2.14 |  |  |  |  |  |
| 120 | 5 | 5.67 | 6 | 242 | 4 | 1.5 | 3.75 |  |  |  |  |
| 121 | 2 | 2.33 |  | 243 | 5.25 | 6.25 | 6 |  |  |  |  |
| 122 | 6.25 | 5.25 | 4.8 | 244 | 5.2 | 2 | 5 |  |  |  |  |

**Notes**: pre-LMR, preoperative lymphocyte-to-monocytes ratio; pos-LMR, post-treatment lymphocyte-to-monocytes ratio; f-LMR, lymphocyte-to-monocytes ratio of pre-end follow-up.

**Abbreviations:** LMR, lymphocyte-to-monocyte ratio.

**Supplementary-Table 5.** Multivariate Cox Proportional-hazard Regression Analysis of Patients’ Recurrence-free Survival

| Characteristics | Multivariate Analysis | | | |
| --- | --- | --- | --- | --- |
| **Total cohort** | | **Adjuvant Therapy Group** | |
| HR (95% CI) | p-value | HR (95% CI) | p-value |
| preoperative NLR |  |  |  |  |
| Gender |  |  |  |  |
| Female | 1 (Referent) |  | 1 (Referent) |  |
| Male | 0.704 (0.477-1.040) | 0.078 | 1.804 (1.134-2.868) | 0.013 |
| N stage |  |  |  |  |
| 0 | 1 (Referent) |  | 1 (Referent) |  |
| 1 | 2.869 (1.809-4.550) | <0.001 | 2.727 (1.603-4.640) | <0.001 |
| 2 | 4.397 (22.873-7.565) | <0.001 | 4.728 (2.766-8.0822) | <0.001 |
| Chemotherapy |  |  |  |  |
| No | 1 (Referent) |  | - |  |
| Yes | 1.326 (0.822-2.139) | 0.248 | - |  |
| pre-NLR | 2.039 (1.331-3.122) | 0.001 | 2.114 (1.317-3.394) | 0.002 |
| p-NLR-p change |  |  |  |  |
| Gender |  |  |  |  |
| Female | - | - | 1 (Referent) |  |
| Male | - | - | 1.799 (1.131-2.861) | 0.013 |
| N stage |  |  |  |  |
| 0 | - | - | 1 (Referent) |  |
| 1 | - | - | 2.727 (1.603-4.639) | <0.001 |
| 2 | - | - | 4.730 (2.750-8.136) | <0.001 |
| p-NLR-p change group |  |  |  |  |
| High to High | - | - | 1 (Referent) |  |
| Low to High | - | - | 0.908 (0.483-1.708) | 0.765 |
| High to Low | - | - | 2.060 (1.208-3.514) | 0.008 |
| Low to Low | - | - | 2.053 (0.901-4.677) | 0.087 |

**Notes:** pre-NLR, preoperative neutrophil-lymphocyte ratio; *pos-NLR, post-treatment neutrophil-lymphocyte ratio; p-NLR-p change group, the dynamic change of neutrophil-lymphocyte ratio from preoperative to post-treatment.

**Abbreviations:** NLR, neutrophil-lymphocyte ratio; CI, confidence interval; HR, hazard ratio.

**Supplementary-Table 6**. Baseline clinicopathologic characteristics of the dynamic changes in p-LMR-p in CRC patients with adjuvant therapies

| Variable | p-LMR-p Change group* | | | | | |
| --- | --- | --- | --- | --- | --- | --- |
| Overall  (n=238) | High-High  n (%) | Low-High  n (%) | High-Low  n (%) | Low-Low  n (%) | p-value |
| Age |  |  |  |  |  |  |
| <=70 | 212 | 57 (26.9) | 35 (16.5) | 38 (17.9) | 82 (38.7) | 0.096 |
| >70 | 26 | 3 (11.5) | 7 (26.9) | 2 (7.7) | 14 (53.8) | - |
| Gender |  |  |  |  |  |  |
| Female | 89 | 29 (32.6) | 19 (21.3) | 13 (14.6) | 28 (31.5) | 0.061 |
| Male | 149 | 31 (20.8) | 23 (15.4) | 27 (18.1) | 68 (45.6) | - |
| T stage |  |  |  |  |  |  |
| 1 | 1 | 0 (0) | 0 (0.0) | 1 (100.0) | 0 (0) | 0.020 |
| 2 | 28 | 13 (46.4) | 5 (17.9) | 5 (17.9) | 5 (17.9) | - |
| 3 | 45 | 6 (13.3) | 7 (15.6) | 10 (22.2) | 22 (48.9) | - |
| 4 | 164 | 41 (25.0) | 30 (18.3) | 24 (14.6) | 69 (42.1) | - |
| N stage |  |  |  |  |  |  |
| 0 | 111 | 29 (26.1) | 21 (18.9) | 14 (12.6) | 47 (42.3) | 0.059 |
| 1 | 79 | 26 (32.9) | 13 (16.5) | 16 (20.3) | 24 (30.4) | - |
| 2 | 48 | 5 (10.4) | 8 (16.7) | 10 (20.8) | 25 (52.1) | - |
| Grade |  |  |  |  |  |  |
| High | 11 | 4 (36.4) | 1 (9.1) | 2 (18.2) | 4 (36.4) | 0.881 |
| Mod | 158 | 42 (26.6) | 27 (17.1) | 27 (17.1) | 62 (39.2) | - |
| Low | 69 | 14 (20.3) | 14 (20.3) | 11 (15.9) | 30 (43.5) | - |
| Site |  |  |  |  |  |  |
| Right-sided colon | 59 | 14 (23.7) | 15 (25.4) | 3 (5.1) | 27 (45.8) | 0.002 |
| Left-sided colon | 70 | 13 (18.6) | 17 (24.3) | 10 (14.3) | 30 (42.9) | - |
| Rectum | 109 | 33 (30.3) | 10 (9.2) | 27 (24.8) | 39 (35.8) | - |
| Adjuvant therapy |  |  |  |  |  |  |
| Chemotherapy | 207 | 52 (25.1) | 41 (19.8) | 29 (14.0) | 85 (41.1) | 0.008 |
| Chemoradiotherapy | 31 | 8 (25.8) | 1 (3.2) | 11 (35.5) | 11 (35.5) |  |
| Diabetes |  |  |  |  |  |  |
| No | 219 | 56 (25.6) | 39 (17.8) | 37 (16.9) | 87 (39.7) | 0.930 |
| Yes | 19 | 4 (21.1) | 3 (15.8) | 3 (15.8) | 9 (47.4) |  |

**Notes**: *The p-LMR-p change group refers to the dynamic change of lymphocyte-to-monocyte ratio from preoperative to post-treatment.

**Abbreviations**: LMR, lymphocyte-to-monocyte ratio; CRC, colorectal cancer; n, number; Mod, moderate.

**Supplementary-Table 7**. Baseline clinicopathologic characteristics of the dynamic changes in p-LMR-p in CRC patients with radical surgery

| Variable | p-LMR-p Change group* | | | | | |
| --- | --- | --- | --- | --- | --- | --- |
| Overall  (n=119) | High-High  n (%) | Low-High  n (%) | High-Low  n (%) | Low-Low  n (%) | p-value |
| Age |  |  |  |  |  |  |
| <=70 | 78 | 14 (17.9) | 6 (7.7) | 31 (39.7) | 27 (34.6) | 0.022 |
| >70 | 41 | 2 (4.9) | 4 (9.8) | 10 (24.4) | 25 (61.0) | - |
| Gender |  |  |  |  |  |  |
| Female | 60 | 13 (21.7) | 3 (5.0) | 25 (41.7) | 19 (31.7) | 0.004 |
| Male | 59 | 3 (5.1) | 7 (11.9) | 16 (27.1) | 33 (55.9) | - |
| T stage |  |  |  |  |  |  |
| 1 | 8 | 1 (12.5) | 0 (0.0) | 6 (75.0) | 1 (12.5) | 0.312 |
| 2 | 41 | 8 (19.5) | 4 (9.8) | 14 (34.1) | 15 (36.6) | - |
| 3 | 13 | 1 (7.7) | 1 (7.7) | 5 (38.5) | 6 (46.2) | - |
| 4 | 57 | 6 (10.5) | 5 (8.8) | 16 (28.1) | 30 (52.6) | - |
| N stage |  |  |  |  |  |  |
| 0 | 102 | 15 (14.7) | 8 (7.8) | 36 (35.3) | 43 (42.2) | 0.102 |
| 1 | 12 | 1 (8.3) | 0 (0) | 3 (25.0) | 8 (66.7) | - |
| 2 | 5 | 0 (0) | 2 (40.0) | 2 (40.0) | 1 (20.0) | - |
| Grade |  |  |  |  |  |  |
| High | 27 | 2 (7.4) | 4 (14.8) | 10 (37.0) | 11 (40.7) | 0.114 |
| Mod | 26 | 4 (15.4) | 1 (3.8) | 4 (15.4) | 17 (65.4) | - |
| Low | 66 | 10 (15.2) | 5 (7.6) | 27 (40.9) | 24 (36.4) | - |
| Site |  |  |  |  |  |  |
| Right-sided colon | 10 | 4 (40.0) | 0 (0) | 3 (30.0) | 3 (30.0) | 0.264 |
| Left-sided colon | 80 | 10 (12.5) | 7 (8.8) | 28 (35.0) | 35 (43.8) | - |
| Rectum | 28 | 2 (7.1) | 3 (10.7) | 10 (35.7) | 13 (46.4) | - |
| Diabetes |  |  |  |  |  |  |
| No | 105 | 14 (13.3) | 9 (8.6) | 35 (33.3) | 47 (44.8) | 0.942 |
| Yes | 14 | 2 (14.3) | 1 (7.1) | 6 (42.9) | 5 (35.7) |  |

**Notes:** *The p-LMR-p change group refers to the dynamic change of LMR from preoperative to post-treatment.

**Abbreviations:** LMR, lymphocyte-to-monocyte ratio; CRC, colorectal cancer; n, number; Mod, moderate.

**Supplementary-Table 8.** Baseline clinicopathologic characteristics of the dynamic changes in p-LMR-f in CRC patients with adjuvant therapies

| Variable | p-LMR-f change group* | | | | | |
| --- | --- | --- | --- | --- | --- | --- |
| Overall  (n=167) | High-High  n (%) | Low-High  n (%) | High-Low  n (%) | Low-Low  n (%) | p-value |
| Age |  |  |  |  |  |  |
| <=70 | 148 | 55 (37.2) | 31 (20.9) | 14 (9.5) | 48 (32.4) | 0.029 |
| >70 | 19 | 6 (31.6) | 0 (0) | 1 (5.3) | 12 (63.2) | - |
| Gender |  |  |  |  |  |  |
| Female | 66 | 35 (53.0) | 12 (18.2) | 3 (4.5) | 16 (24.2) | 0.002 |
| Male | 101 | 26 (25.7) | 19 (18.8) | 12 (11.9) | 44 (43.6) | - |
| T stage |  |  |  |  |  |  |
| 1 | 1 | 0 (0.0) | 1 (100) | 0 (0.0) | 0 (0) | 0.057 |
| 2 | 22 | 13 (59.1) | 3 (13.6) | 1 (4.5) | 5 (22.7) | - |
| 3 | 35 | 10 (28.6) | 11 (31.4) | 1 (2.9) | 13 (37.1) | - |
| 4 | 109 | 38 (34.9) | 16 (14.7) | 13 (11.9) | 42 (38.5) | - |
| N stage |  |  |  |  |  |  |
| 0 | 70 | 34 (48.6) | 13 (18.6) | 3 (4.3) | 20 (28.6) | 0.010 |
| 1 | 59 | 22 (37.3) | 11 (18.6) | 7 (11.9) | 19 (32.2) | - |
| 2 | 38 | 5 (13.2) | 7 (18.4) | 5 (13.2) | 21 (55.3) | - |
| Grade |  |  |  |  |  |  |
| High | 9 | 4 (44.4) | 0 (0) | 1 (11.1) | 4 (44.4) | 0.787 |
| Mod | 116 | 44 (37.9) | 22 (19.0) | 9 (7.8) | 41 (35.3) | - |
| Low | 42 | 13 (31.0) | 9 (21.4) | 5 (11.9) | 15 (35.7) | - |
| Site |  |  |  |  |  |  |
| Right colon | 41 | 14 (34.1) | 8 (19.5) | 8 (19.5) | 11 (26.8) | 0.069 |
| Left colon | 48 | 19 (39.6) | 6 (12.5) | 5 (10.4) | 18 (37.5) | - |
| Rectum | 78 | 28 (35.9) | 17 (21.8) | 2 (2.6) | 31 (39.7) | - |
| CEA |  |  |  |  |  |  |
| Low | 75 | 33 (44.0) | 16 (21.3) | 5 (6.7) | 21 (28.0) | 0.008 |
| High | 61 | 16 (26.2) | 6 (9.8) | 7 (11.5) | 32 (52.5) | - |
| Unknown | 31 | - | - | - | - | - |

**Notes**: *p-LMR-f change group refers to the dynamic change in lymphocyte-to-monocyte ratio from post-treatment to pre-end of follow-up.

**Abbreviations**: Mod, moderate; LMR, lymphocyte-to-monocyte ratio; n, number.

**Supplementary-Table 9**. The sensitivity, specificity, and AUC of markers for CRC recurrence

| **Variable** | **AUC** | **Sensitivity%** | **Specificity%** | **Accuracy%** |
| --- | --- | --- | --- | --- |
| **Total cohort** |  |  |  |  |
| f-LMR | 0.689 | 64.0 | 75.3 | 69.5 |
| p-LMR-f | 0.704 | 64.0 | 75.3 | 69.5 |
| CEA | 0.851 | 78.5 | 91.7 | 84.7 |
| CEA+ f-LMR | 0.905 | 78.5 | 93.2 | 85.0 |
| CEA+ p-LMR-f | 0.913 | 81.7 | 90.5 | 85.6 |
| **Adjuvant therapy group** |  |  |  |  |
| f-LMR | 0.694 | 62.5 | 75.2 | 68.9 |
| p-LMR-f | 0.70 | 62.5 | 75.2 | 68.9 |
| CEA | 0.86 | 76.6 | 95.3 | 85.1 |
| CEA+ f-LMR | 0.915 | 76.6 | 96.6 | 85.3 |
| CEA+ p-LMR-f | 0.924 | 80.5 | 93.2 | 86.0 |

**Notes**: f-LMR, pre-end of follow-up lymphocyte-to-monocytes ratio; p-LMR-f change group, the dynamic changes of lymphocyte-to-monocytes ratio from post-treatment to pre-end of follow-up; f-NLR, neutrophil-lymphocyte ratio pre-end of follow-up; p-NLR-f change group, the dynamic changes of neutrophil-lymphocyte ratio from post-treatment to pre-end of follow-up.

**Abbreviations**: LMR, lymphocyte-to-monocytes ratio; NLR, neutrophil-lymphocyte ratio; AUC, the area under the curve.

**Supplementary-Figure 1.** Nomogram of the prediction model


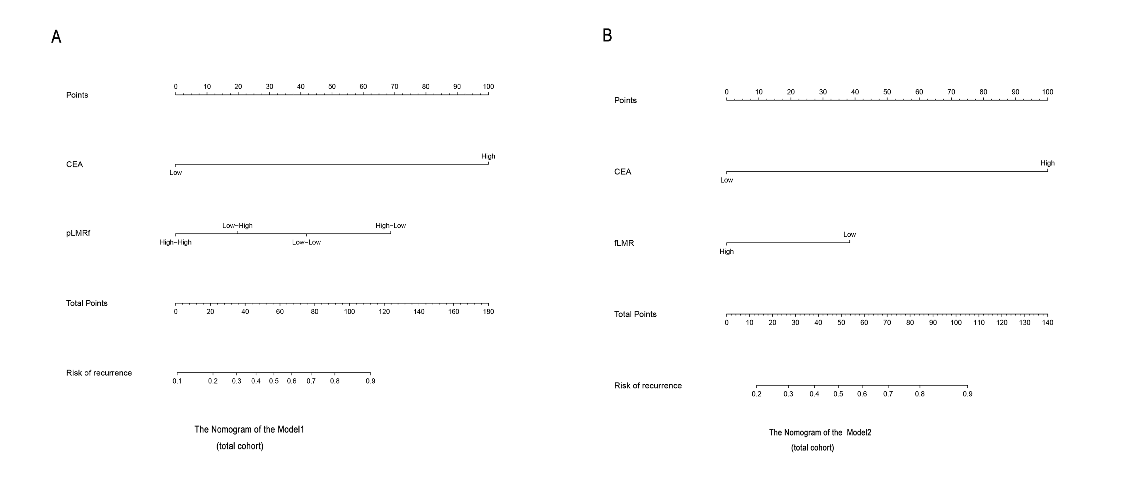


**Notes:** (A) The nomogram of prediction model1. (B) The nomogram of prediction model2.

**Abbreviations:** f-LMR, Lymphocyte-to-monocytes ratio pre-end of follow-up; p-LMR-f, the changes of lymphocyte-to-monocytes ratio from post-treatment to pre-end of follow-up.

**Supplementary-Figure 2.** The calibration curve results **of the model in the total cohort and adjuvant therapy group**


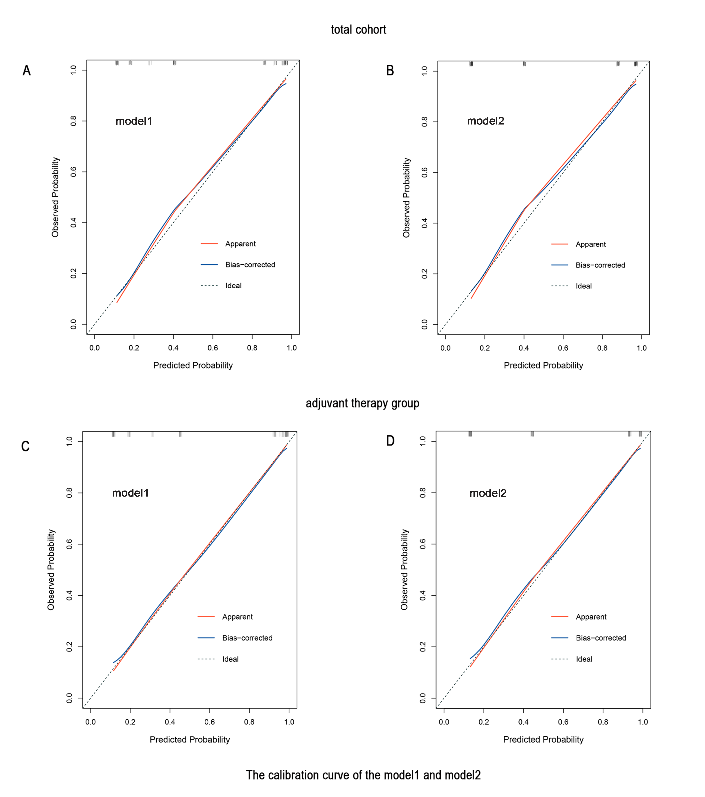


**Notes:**(A-B) The calibration curve results of model1 and model2 in the total cohort. (C-D) The calibration curve results of model1 and model2 in the adjuvant therapy group.

**Supplementary-Figure 3. The results of the** prediction model's Clinical Impact Curve (CIC)


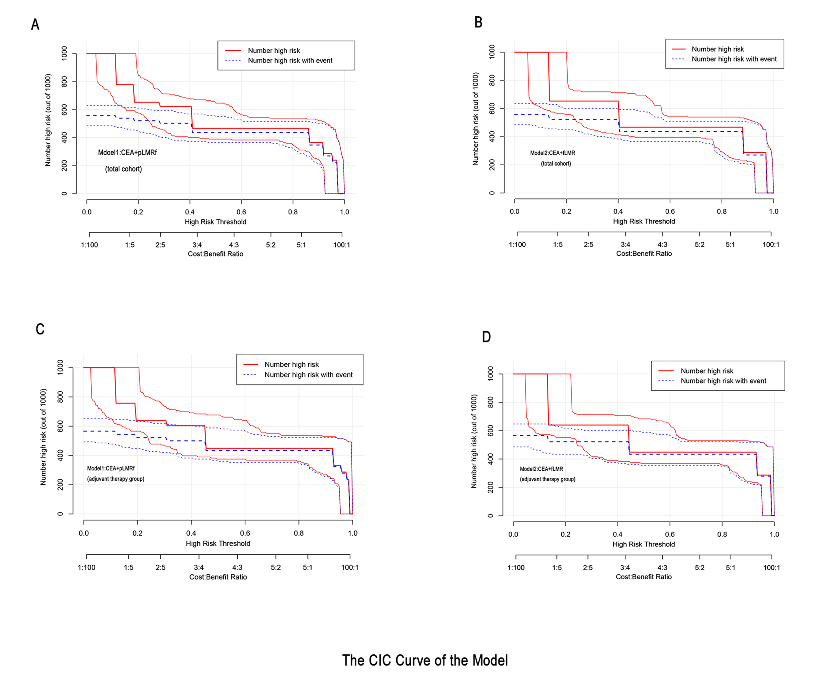


**Notes:**(A-B) The prediction model1 and model2 impact curve in the total cohort. (C-D) The impact curve of the prediction model1 and model2 in the adjuvant therapy group.
